# Supplementary material for: A Novel Semiconductor-Based Flow Cytometer with Enhanced Light-Scatter Sensitivity for the Analysis of Biological Nanoparticles
Source: PubMed Central journal article supplement (PMC6831566; doi:10.1038/s41598-019-52366-4), 2019-11-05
Supplement: 41598_2019_52366_MOESM1_ESM.pdf [file 41598_2019_52366_MOESM1_ESM.pdf]

## Supplementary Information

# A Novel Semiconductor-Based Flow Cytometer with Enhanced Light-Scatter Sensitivity for the Analysis of Biological Nanoparticles

George C. Brittain, IV<sup>1</sup>, Yong Q. Chen<sup>1</sup>, Edgar Martinez<sup>2</sup>, Vera A. Tang<sup>3,4</sup>, Tyler M. Renner<sup>4</sup>, Marc-André Langlois<sup>3,4,5</sup>, and Sergei Gulnik<sup>1</sup>

<sup>1</sup>Beckman Coulter Life Sciences, Life Science Research. <sup>2</sup>Beckman Coulter Life Sciences, Particle Characterization. <sup>3</sup>University of Ottawa Flow Cytometry and Virometry Core Facility. <sup>4</sup>Department of Biochemistry, Microbiology and Immunology, Faculty of Medicine, University of Ottawa. <sup>5</sup>Ottawa Center for Infection, Immunity and Inflammation (CI3).

**Running Title: Enhanced Light-Scatter Sensitivity on the CytoFLEX**

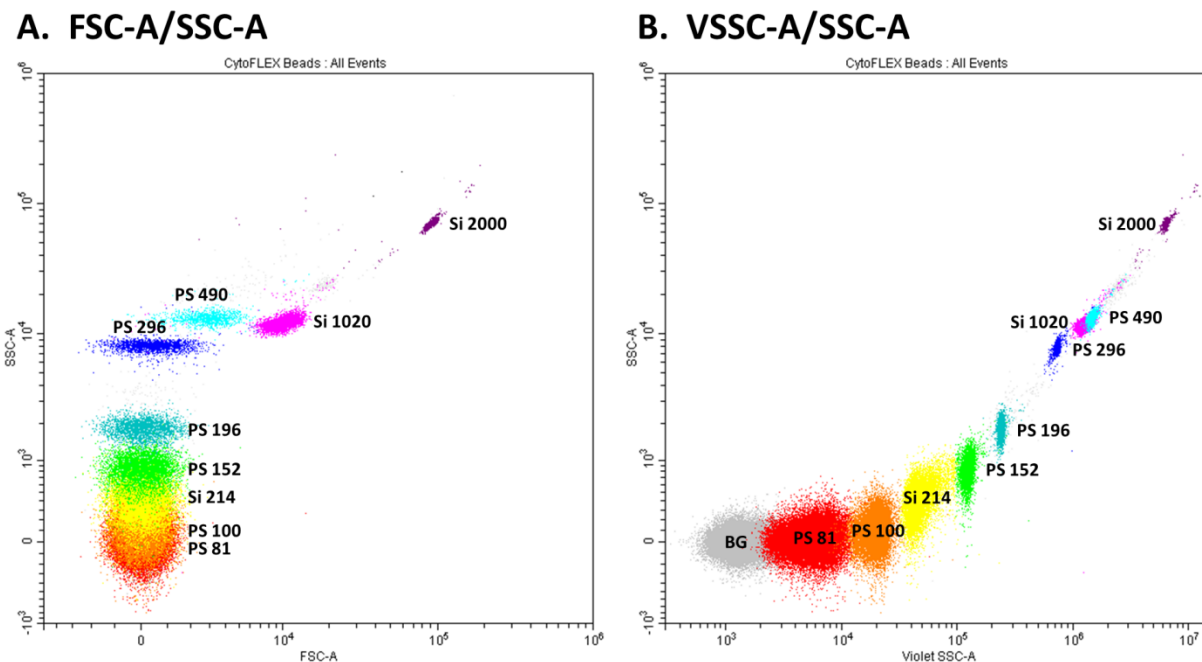

**Supplementary Figure 1.** FSC, SSC, and VSSC Detection on the CytoFLEX. A) FSC on the CytoFLEX uses a digital signal-analysis approach, called axial light loss detection, which can be used to resolve particles as small as 500nm, mostly independent of the refractive index or membrane integrity. B) SSC on the CytoFLEX can resolve approximately 125nm PS and 200nm Si particles, while the VSSC signal is unfiltered and can fully resolve down to at least 81nm PS. VSSC gain = 200; VSSC-H threshold = 1500.

| Reference                             | 34        | 35        | 36        | 37        | 38        | Average       | SD        | CV (%) |
|---------------------------------------|-----------|-----------|-----------|-----------|-----------|---------------|-----------|--------|
| Length (nm)                           | 300       | 350       | 309       | 320       | 333       | 322.4         | 19.76     | 6.128  |
| Width (nm)                            | 230       | 250       | 237       | 250       | 268       | 247.0         | 14.56     | 5.895  |
| Height (nm)                           | 180       | 150       | 137       | 195       | 185       | 169.4         | 24.68     | 14.571 |
| Ellipsoidal Volume (nm <sup>3</sup> ) | 6,503,091 | 6,872,228 | 5,253,221 | 8,168,134 | 8,644,682 | 7,088,271     | 1,355,087 | 19.117 |
| Spherical Diameter (nm)               | 231.58    | 235.89    | 215.68    | 249.87    | 254.63    | <b>237.53</b> | 15.49     | 6.523  |

**Supplementary Table 1.** Calculating an Approximate Spherical Diameter for Vaccinia. Ellipsoidal volumes were first determined based on dimensions from literature, and then the diameters of spheres of equivalent volume were calculated. The average spherical diameter was used in order to enable characterization by Mie theory.

## Population Statistics

| Particle   | Size (nm) | VSSC-H  | SD      | CV (%) |
|------------|-----------|---------|---------|--------|
| PS 60nm    | 60        | 4224.7  | 1.84    | 0.043  |
| PS 70nm    | 70        | 7512.2  | 27.31   | 0.364  |
| PS 81nm    | 81        | 15248.5 | 36.07   | 0.237  |
| PS 92nm    | 92        | 29488.8 | 132.93  | 0.451  |
| PS 100nm   | 100       | 52564.6 | 143.39  | 0.273  |
| PS 125nm   | 125       | 152420  | 582.43  | 0.382  |
| PS 152nm   | 152       | 347417  | 1143.93 | 0.329  |
| PS 203nm   | 203       | 924374  | 3790.73 | 0.410  |
| PS 296nm   | 296       | 2163788 | 13337.5 | 0.616  |
| Si 98.6nm  | 98.6      | 6401.2  | 37.20   | 0.581  |
| Si 110nm   | 110       | 10034.8 | 41.01   | 0.409  |
| Si 160nm   | 160       | 44581.7 | 217.60  | 0.488  |
| Si 214nm   | 214       | 133302  | 55.25   | 0.041  |
| Si 293nm   | 293       | 273710  | 237.71  | 0.087  |
| HAdV-5     | ~95       | 8593.6  | 52.73   | 0.614  |
| MLV        | ~110      | 16760.1 | 23.45   | 0.140  |
| HSV-1      | ~157      | 79303.9 | 151.01  | 0.190  |
| Vaccinia   | ~237.5    | 245304  | 1191.13 | 0.486  |
| HIV-1 Peak | ~100      | 13064.7 | 10.15   | 0.078  |
| HIV-1 Mean | Variable  | 20645.9 | 254.65  | 1.233  |

**Supplementary Table 2.** The Average Population Statistics for the Data in Figure 2. All samples were read in triplicate. VSSC gain = 400; VSSC-H threshold = 3000. The VSSC-H threshold for HSV-1 and Vaccinia was 40K and 100K, respectively.

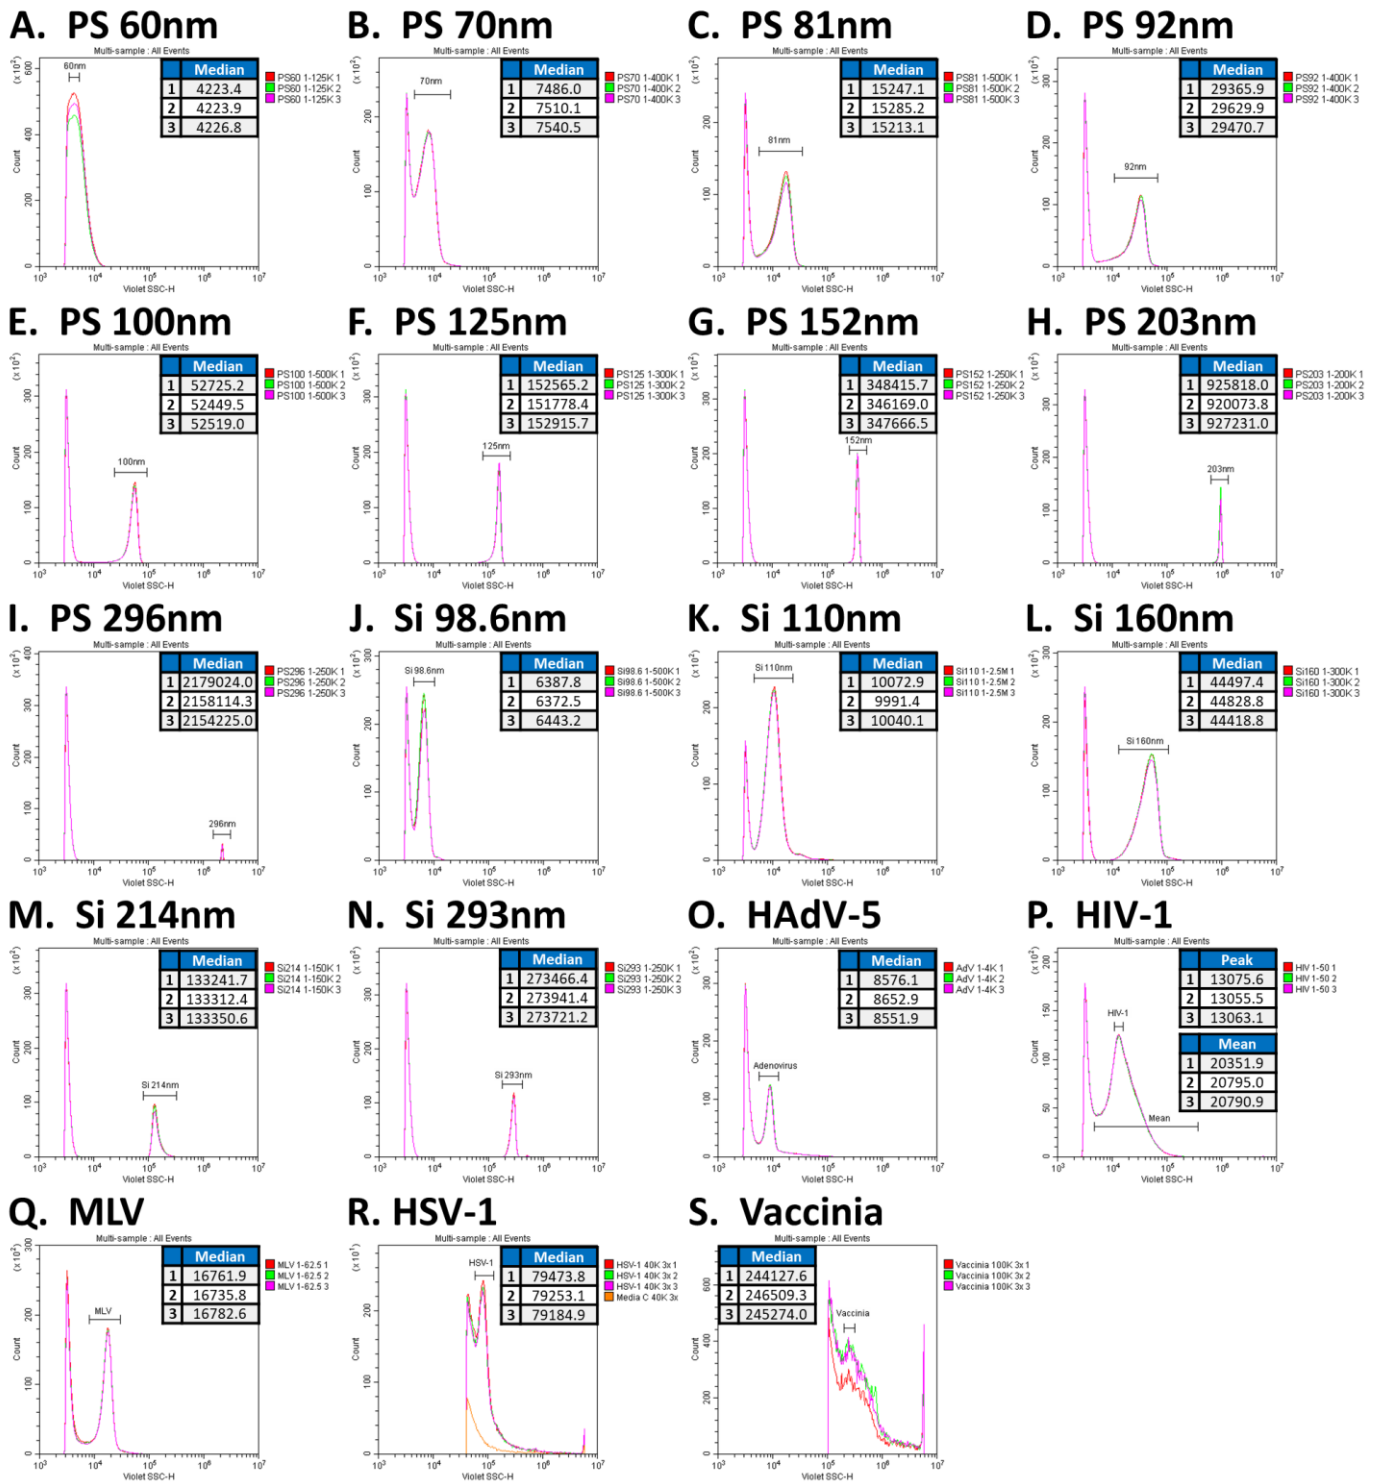

**Supplementary Figure 2.** Individual Measurements for Each Particle Analyzed in Figure 2. A-I) NIST-traceable PS particles between 60-296nm. J-M) Si particles between 98.6-293nm. The 98.6nm Si particles in J are NIST traceable. O-S) Viruses: HAdV-5, HIV-1, MLV, HSV-1 and Vaccinia. All samples were serially diluted and acquired in triplicate within their optimal concentration ranges. VSSC gain = 400; VSSC-H threshold = 3000. The VSSC-H threshold for HSV-1 and Vaccinia was 40K and 100K, respectively, in order to threshold out cellular debris from the freeze/thaw cell-fracture method used for preparation.

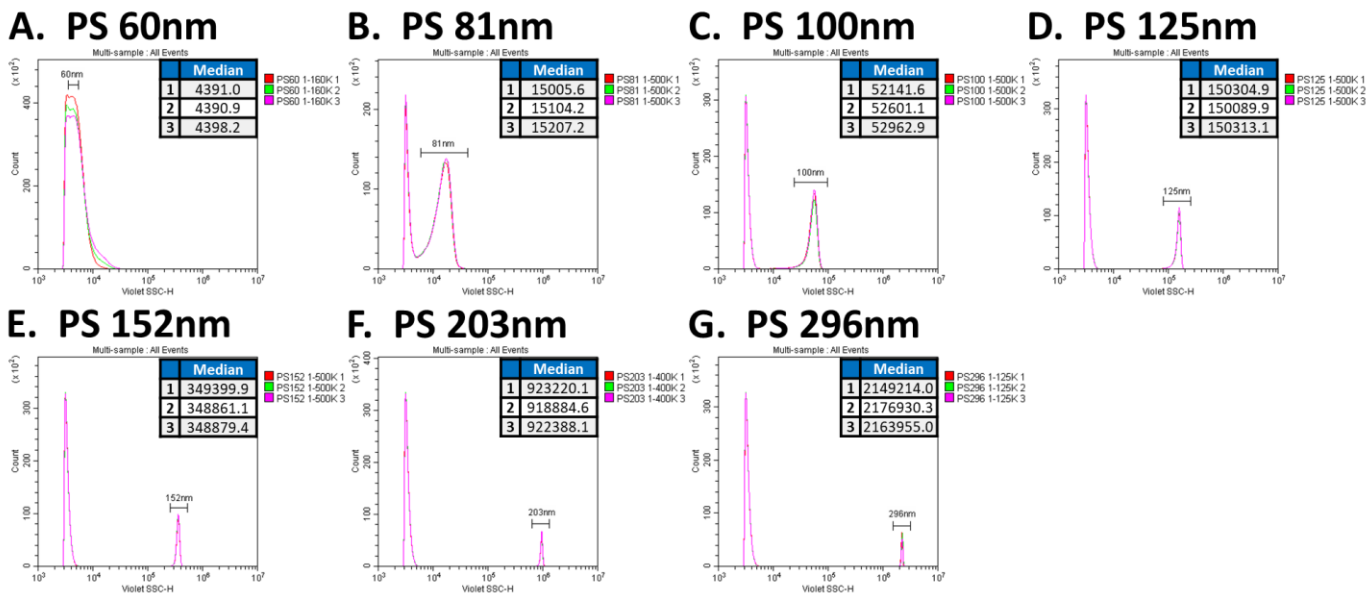

**Supplementary Figure 3.** Individual Measurements for Each Reference Standard Used for Scaling in Supplementary Figure 4. A-G) NIST-traceable PS particles between 60–296nm. All samples were serially diluted and acquired in triplicate within their optimal concentration ranges. VSSC gain = 400; VSSC-H threshold = 3000.

**A. PS NIST Reference Standards**

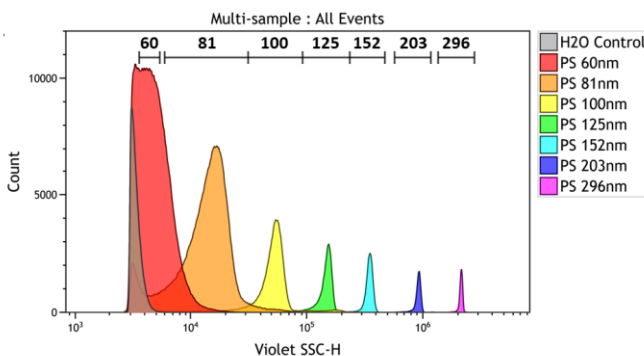

|                           | PS 60   | PS 81   | PS 100  | PS 125  | PS 152  | PS 203  | PS 296  |
|---------------------------|---------|---------|---------|---------|---------|---------|---------|
| <b>VSSC-H</b>             | 4393.4  | 15105.7 | 52568.5 | 150236  | 349047  | 921498  | 2163366 |
| <b>SD</b>                 | 4.19    | 100.81  | 411.62  | 126.56  | 305.93  | 2300.84 | 13867.5 |
| <b>CV (%)</b>             | 0.095   | 0.667   | 0.783   | 0.084   | 0.088   | 0.250   | 0.641   |
| <b>Scatter Efficiency</b> | 0.00699 | 0.02147 | 0.04495 | 0.09075 | 0.15388 | 0.32511 | 0.79578 |

**B. Mie-Theory Scatter Efficiencies**

| RI   | 60nm     | 81nm     | 100nm    | 125nm   | 152nm   | 203nm   | 296nm   |
|------|----------|----------|----------|---------|---------|---------|---------|
| 1.35 | 1.07E-05 | 3.16E-05 | 6.42E-05 | 0.00013 | 0.00022 | 0.00044 | 0.00108 |
| 1.40 | 0.00032  | 0.00095  | 0.00194  | 0.00387 | 0.00661 | 0.01332 | 0.03361 |
| 1.45 | 0.00106  | 0.00316  | 0.00649  | 0.01299 | 0.02214 | 0.04481 | 0.11423 |
| 1.50 | 0.00221  | 0.00667  | 0.01379  | 0.02767 | 0.04711 | 0.09603 | 0.24489 |
| 1.55 | 0.00378  | 0.01149  | 0.02388  | 0.04805 | 0.08168 | 0.16834 | 0.42515 |
| 1.60 | 0.00576  | 0.01762  | 0.03679  | 0.07421 | 0.12594 | 0.26349 | 0.65328 |
| 1.65 | 0.00812  | 0.02504  | 0.05255  | 0.10618 | 0.17992 | 0.38362 | 0.92767 |
| 1.70 | 0.01087  | 0.03373  | 0.07114  | 0.14393 | 0.24367 | 0.53100 | 1.24710 |
| 1.75 | 0.01397  | 0.04368  | 0.09253  | 0.18741 | 0.31728 | 0.70740 | 1.60800 |
| 1.80 | 0.01742  | 0.05484  | 0.11669  | 0.23652 | 0.40104 | 0.91307 | 2.00040 |

**C. Conversion to VSSC Intensities**

| RI   | 60nm    | 81nm    | 100nm   | 125nm   | 152nm   | 203nm   | 296nm   |
|------|---------|---------|---------|---------|---------|---------|---------|
| 1.35 | 6.75    | 22.26   | 75.11   | 210.94  | 493.06  | 1239.49 | 2948.54 |
| 1.40 | 201.45  | 669.47  | 2272.95 | 6410.99 | 14986.5 | 37745.9 | 91367.7 |
| 1.45 | 663.98  | 2223.67 | 7593.43 | 21499.6 | 50224.8 | 127019  | 310540  |
| 1.50 | 1391.46 | 4695.16 | 16122.9 | 45800.4 | 106860  | 272192  | 665745  |
| 1.55 | 2378.98 | 8087.27 | 27923.3 | 79540.6 | 185280  | 477146  | 1155791 |
| 1.60 | 3620.30 | 12398.7 | 43030.0 | 122849  | 285670  | 746841  | 1775973 |
| 1.65 | 5107.52 | 17619.2 | 61456.8 | 175778  | 408113  | 1087339 | 2521916 |
| 1.70 | 6832.20 | 23736.9 | 83194.6 | 238272  | 552718  | 1505076 | 3390302 |
| 1.75 | 8783.72 | 30733.5 | 108214  | 310252  | 719688  | 2005067 | 4371426 |
| 1.80 | 10951.5 | 38586.4 | 136471  | 391553  | 909681  | 2588022 | 5438184 |

**Supplementary Figure 4.** Scaling Mie-Theory Scatter-Efficiency Curves to the Real VSSC Intensities of the CytoFLEX. A) Acquisition of reference standards to scale the Mie-theory scatter-efficiency curves to the real instrument scatter intensities. 60–296nm PS particles were collected in triplicate and the population statistics are displayed in the table. B) A matrix of Mie-theory scatter efficiencies was calculated for the different-sized particles at different RIs. C) A matrix of estimated VSSC intensities, used to prepare the RI contours for a VSSC vs. Size plot, was converted from the reference particle data in A using the Mie-theory scatter efficiencies in B. All samples were collected in triplicate and these data represent the population means. VSSC gain = 400; VSSC-H threshold = 3000.

### A. Approximate VSSC Intensity for 95, 100 and 110nm at RI 1.627

|                | PS 81   | PS 100  | PS 125 |
|----------------|---------|---------|--------|
| Average VSSC-H | 15105.7 | 52568.5 | 150236 |
| SD             | 100.8   | 411.6   | 126.6  |
| CV (%)         | 0.67    | 0.78    | 0.08   |

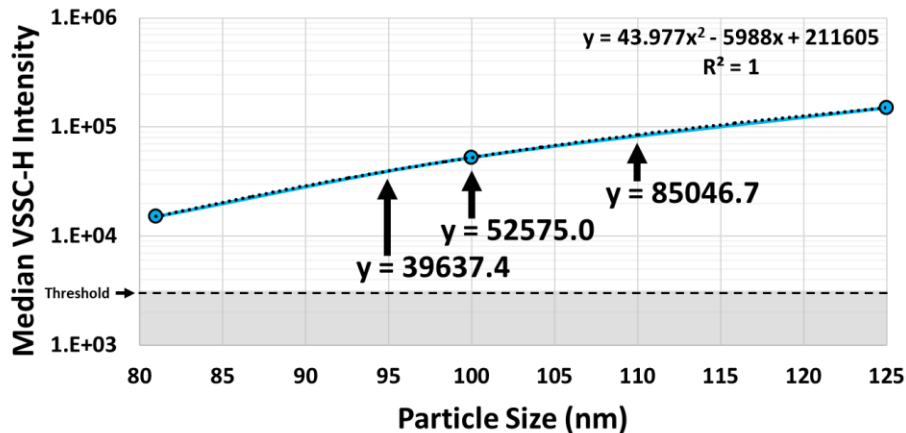

### B. RI for 95nm HAdV-5

|         | Scatter Efficiency | Estimated VSSC |
|---------|--------------------|----------------|
| PS 95.0 | 0.03775            | 39637.4        |

| RI    | Scatter Efficiency | Conversion to VSSC |
|-------|--------------------|--------------------|
| 1.450 | 0.00548            | 5749.44            |
| 1.455 | 0.00599            | 6284.26            |
| 1.460 | 0.00652            | 6843.24            |
| 1.465 | 0.00707            | 7426.47            |
| 1.470 | 0.00765            | 8034.05            |
| 1.475 | 0.00825            | 8665.99            |
| 1.480 | 0.00888            | 9322.30            |
| 1.485 | 0.00953            | 10003.1            |
| 1.490 | 0.01020            | 10708.1            |

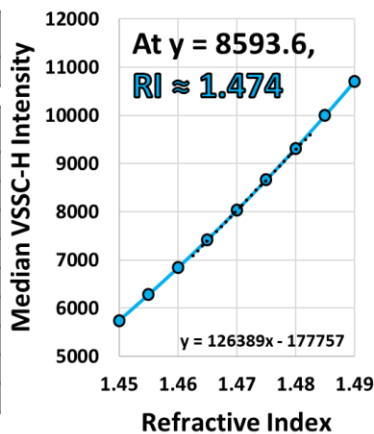

### C. RI for 100nm HIV-1

|          | Scatter Efficiency | Estimated VSSC |
|----------|--------------------|----------------|
| PS 100.0 | 0.04495            | 52575.0        |

| RI    | Scatter Efficiency | Conversion to VSSC |
|-------|--------------------|--------------------|
| 1.46  | 0.00773            | 9041.46            |
| 1.465 | 0.00839            | 9813.32            |
| 1.47  | 0.00908            | 10617.5            |
| 1.475 | 0.00979            | 11454.1            |
| 1.48  | 0.01054            | 12323.5            |
| 1.485 | 0.01131            | 13224.2            |
| 1.49  | 0.01211            | 14158.7            |
| 1.495 | 0.01293            | 15126.0            |
| 1.5   | 0.01379            | 16124.9            |

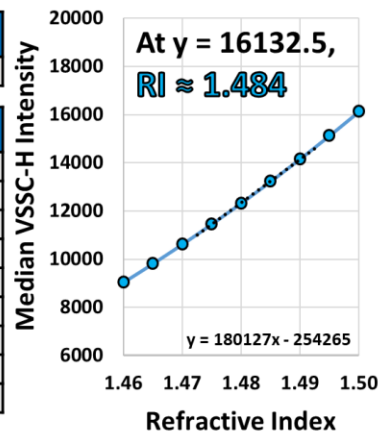

### D. RI for 110nm MLV

|          | Scatter Efficiency | Estimated VSSC |
|----------|--------------------|----------------|
| PS 110.0 | 0.06143            | 85046.7        |

| RI    | Scatter Efficiency | Conversion to VSSC |
|-------|--------------------|--------------------|
| 1.450 | 0.00882            | 12210.2            |
| 1.455 | 0.00964            | 13350.1            |
| 1.460 | 0.01050            | 14542.3            |
| 1.465 | 0.01140            | 15786.9            |
| 1.470 | 0.01234            | 17084.1            |
| 1.475 | 0.01332            | 18433.9            |
| 1.480 | 0.01433            | 19836.4            |
| 1.485 | 0.01538            | 21291.4            |
| 1.490 | 0.01647            | 22800.5            |

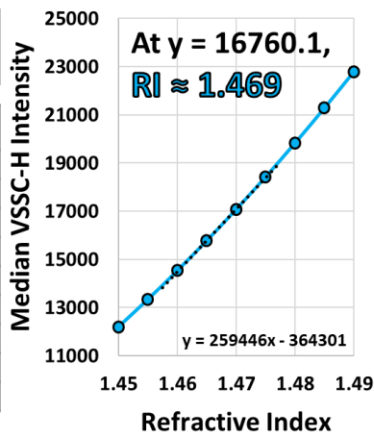

**Supplementary Figure 5.** Calculation of the RIs for HAdV-5, HIV-1 and MLV. A) Approximation of the VSSC intensities for PS particles at sizes equivalent to the viruses: 95, 100 and 110nm. An equation was fit to the VSSC intensity curve for the PS reference standards, and then solved for the approximate VSSC intensities at the sizes of interest. B) Calculation of the RI for HAdV-5. A matrix of Mie-theory scatter efficiencies was prepared within the range of interest, around 1.47 based on the RI contour curves from Figure 4. The scatter efficiencies were then scaled to the VSSC-intensity measurements from the CytoFLEX using the values calculated from the reference standards. The RI was calculated by finding the equation for the linear trendline connecting the 2 RI points closest to the mean VSSC intensity for the virus, and then solving for the RI at  $y =$  the measured VSSC intensity. C) Calculation of the RI for HIV-1. D) Calculation of the RI for MLV.

### A. Approximate VSSC Intensity for 157 and 237.5nm at RI 1.627

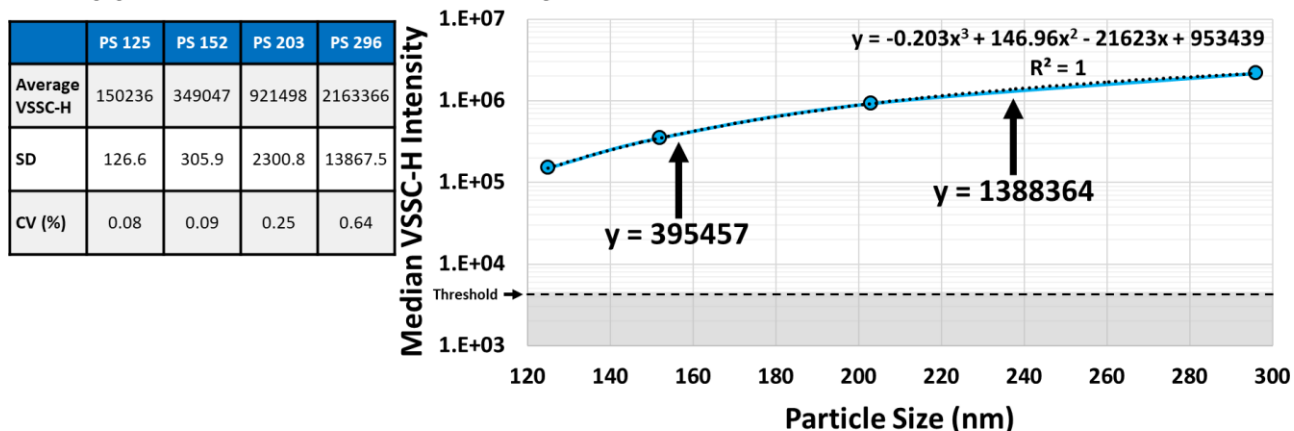

### B. RI for 157nm HSV-1

|          | Scatter Efficiency | Estimated VSSC |
|----------|--------------------|----------------|
| PS 157.0 | 0.16692            | 395457         |

| RI    | Scatter Efficiency | Conversion to VSSC |
|-------|--------------------|--------------------|
| 1.450 | 0.02403            | 56932.8            |
| 1.455 | 0.02628            | 62249.1            |
| 1.460 | 0.02862            | 67807.1            |
| 1.465 | 0.03107            | 73611.5            |
| 1.470 | 0.03362            | 79657.6            |
| 1.475 | 0.03628            | 85950.0            |
| 1.480 | 0.03904            | 92486.5            |
| 1.485 | 0.04190            | 99269.3            |
| 1.490 | 0.04487            | 106296             |

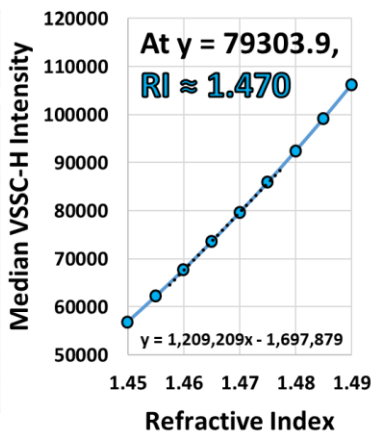

### C. RI for 237.5nm Vaccinia (Spherical)

|          | Scatter Efficiency | Estimated VSSC |
|----------|--------------------|----------------|
| PS 237.5 | 0.49456            | 1388364        |

| RI    | Scatter Efficiency | Conversion to VSSC |
|-------|--------------------|--------------------|
| 1.450 | 0.06659            | 186939             |
| 1.455 | 0.07294            | 204771             |
| 1.460 | 0.07961            | 223476             |
| 1.465 | 0.08658            | 243059             |
| 1.470 | 0.09387            | 263530             |
| 1.475 | 0.10148            | 284882             |
| 1.480 | 0.10941            | 307143             |
| 1.485 | 0.11767            | 330332             |
| 1.490 | 0.12625            | 354418             |

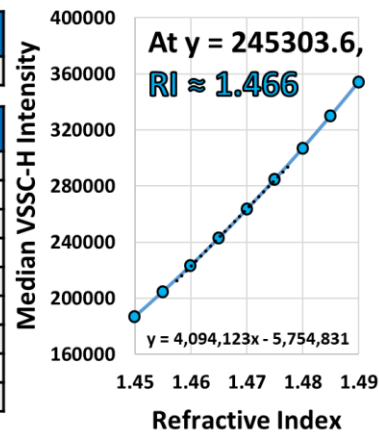

**Supplementary Figure 6.** Calculation of the RIs for HSV-1 and Vaccinia. A) Approximation of the VSSC intensities for PS particles at sizes equivalent to the viruses: 157 and 237.5nm. An equation was fit to the VSSC intensity curve for the PS reference standards, and then solved for the approximate VSSC intensities at the sizes of interest. B) Calculation of the RI for HSV-1. A matrix of Mie-theory scatter efficiencies was prepared within the range of interest, around 1.47. The RI was calculated by finding the equation for the trendline connecting the 2 RI points closest to the mean VSSC intensity and then solving for the RI at  $y =$  the measured VSSC intensity. C) Calculation of the RI for Vaccinia using the spherical diameter estimated in Supplementary Table 1.

### A. Conversion of PS Data to VSSC Intensities at RI 1.47

| Size (nm) | Scatter Efficiency at RI 1.627 | Actual VSSC Intensities | Size (nm) | Scatter Efficiency at RI 1.47 | Conversion to VSSC at RI 1.47 |
|-----------|--------------------------------|-------------------------|-----------|-------------------------------|-------------------------------|
| 60        | 0.00699                        | 4393.37                 | 60        | 0.00147                       | 923.45                        |
| 81        | 0.02147                        | 15105.7                 | 81        | 0.00441                       | 3101.84                       |
| 100       | 0.04495                        | 52568.5                 | 100       | 0.00908                       | 10616.2                       |
| 125       | 0.09075                        | 150236                  | 125       | 0.01818                       | 30099.8                       |
| 152       | 0.15388                        | 349047                  | 152       | 0.03099                       | 70283.4                       |
| 203       | 0.32511                        | 921498                  | 203       | 0.06287                       | 178186                        |
| 296       | 0.79578                        | 2163366                 | 296       | 0.16047                       | 436245                        |

### B. VSSC-H Detection Limit at RI 1.47

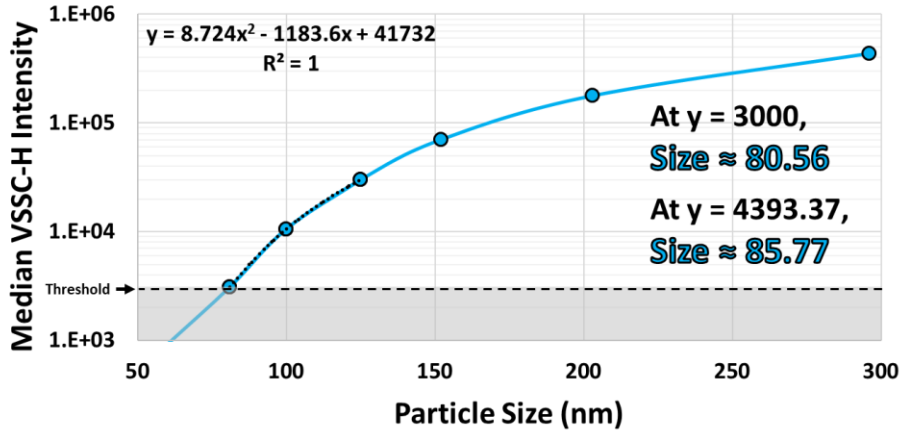

**Supplementary Figure 7.** Calculation of the Detection Limit for Particles with a RI of 1.47. A) Scaling a Mie-theory RI curve for particles with a RI of 1.47 to theoretical VSSC intensities using the PS reference data. B) Fitting an equation to the size range of interest and solving for the size at  $y =$  the VSSC threshold or the VSSC intensity for 60nm PS particles, which is roughly the lower VSSC detection limit, just above optical noise.

**A. VSSC-H Measurements for Donor 1 CD61+ Plasma EVs**

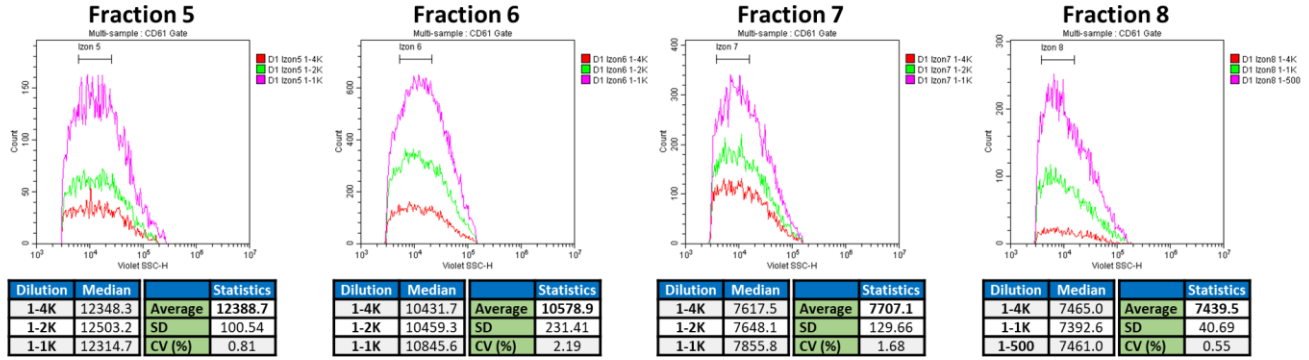

**B. VSSC-H Measurements for Donor 2 CD61+ Plasma EVs**

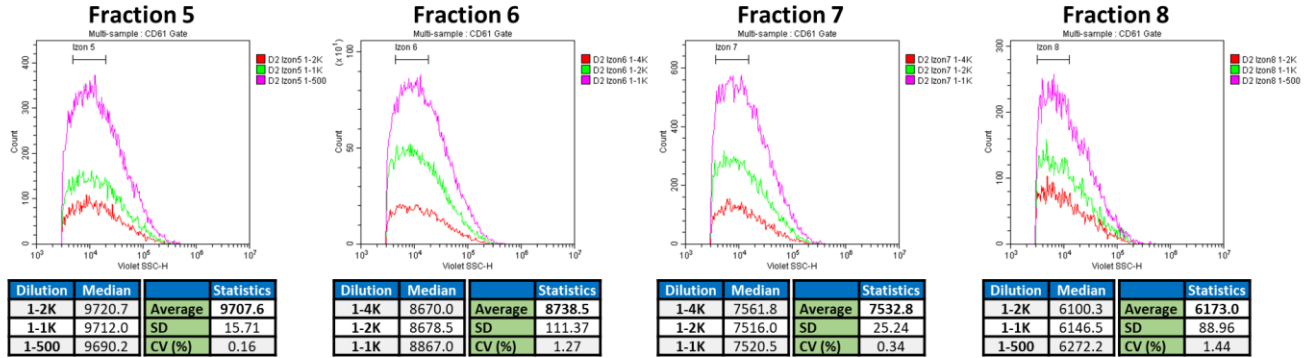

**C. VSSC-H Measurements for Donor 3 CD61+ Plasma EVs**

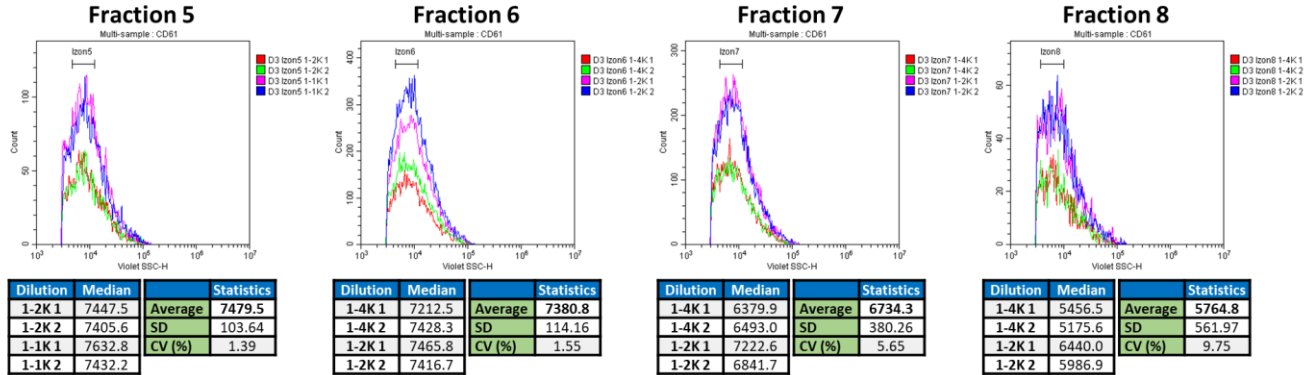

**D. VSSC-H Measurements for Donor 4 CD61+ Plasma EVs**

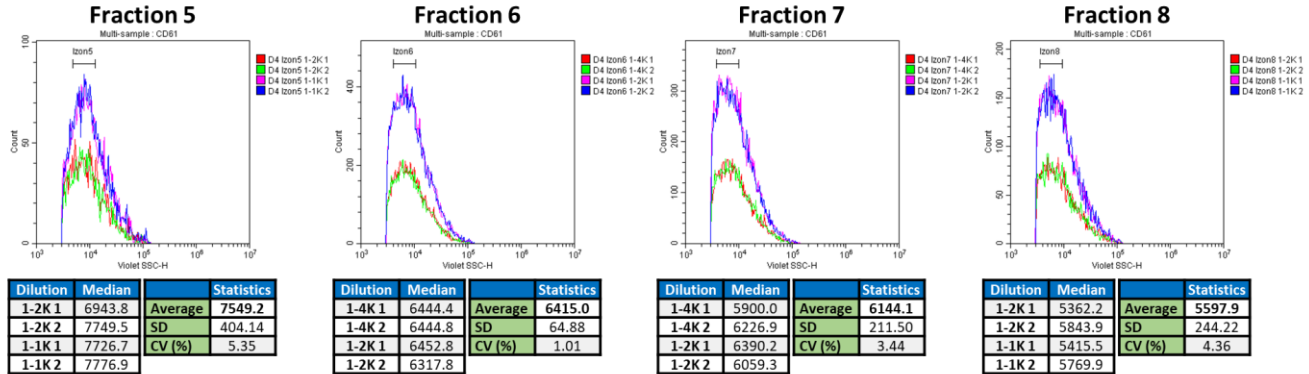

**Supplementary Figure 8.** Serial Dilutions and Alignments of the CD61+ Plasma-EV Samples. VSSC intensity measurements for A) Donor 1, B) Donor 2, C) Donor 3, and D) Donor 4 EV fractions 5-8. The median gates were located at the central population distribution in order to eliminate bias due to a portion of the lower population distributions being cutoff. The population statistics for each sample can be found in the tables. VSSC gain = 400; VSSC-H threshold = 3000.



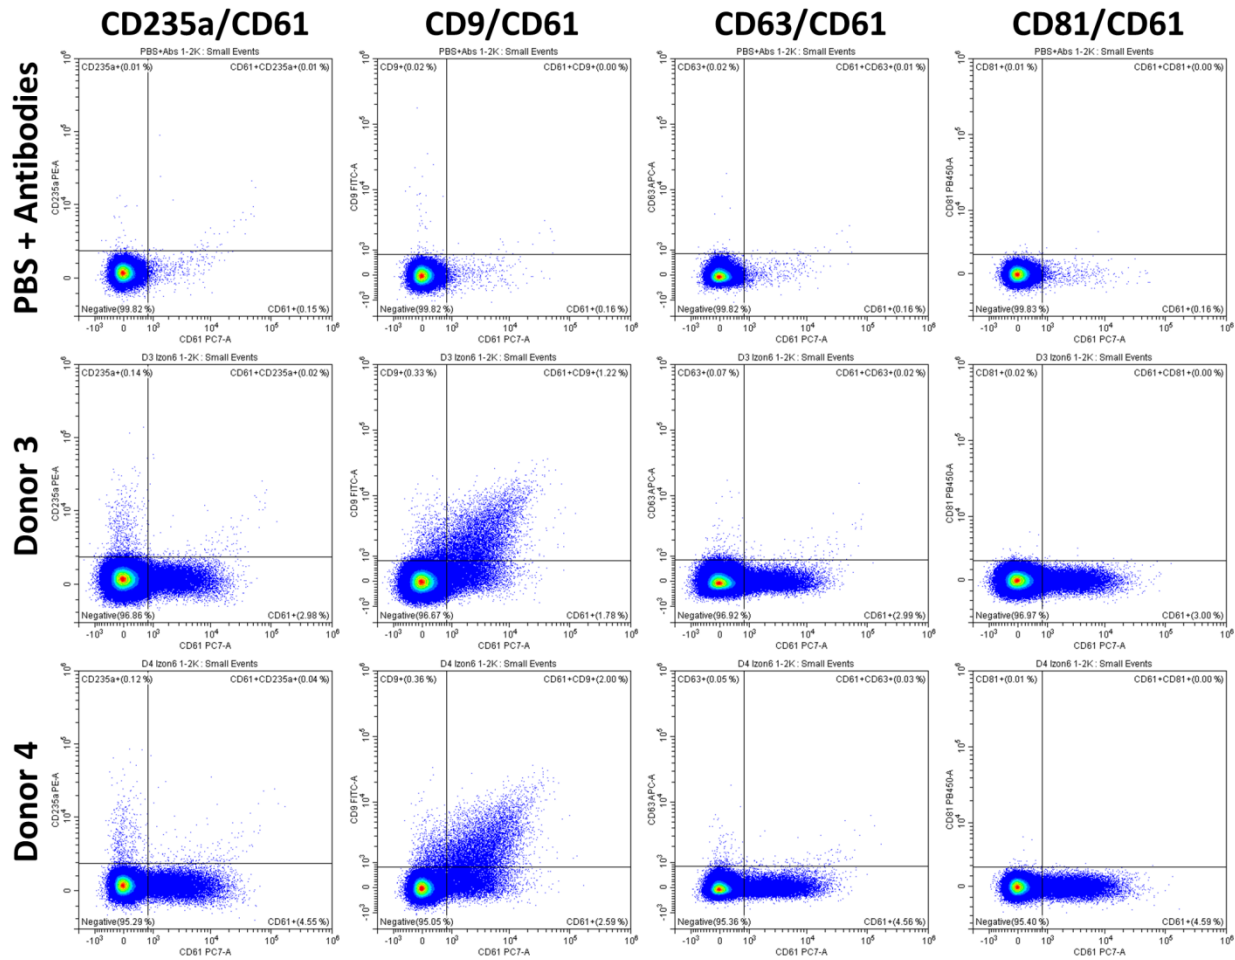

**Supplementary Figure 9.** Tetraspanin Expression on the CD61<sup>+</sup> Plasma EVs from Donors 3 and 4. The CD61<sup>+</sup> EVs were 40.7% and 43.6% CD9<sup>+</sup> for Donor 3 and 4, respectively. CD63 and CD81 expression was absent, and they were CD235a negative. The PBS + antibody control shows minimal antibody aggregates. These samples were serially diluted and acquired in quadruplicate. VSSC gain = 400; VSSC-H threshold = 3000.

### A. Median Diameter - Donor 1

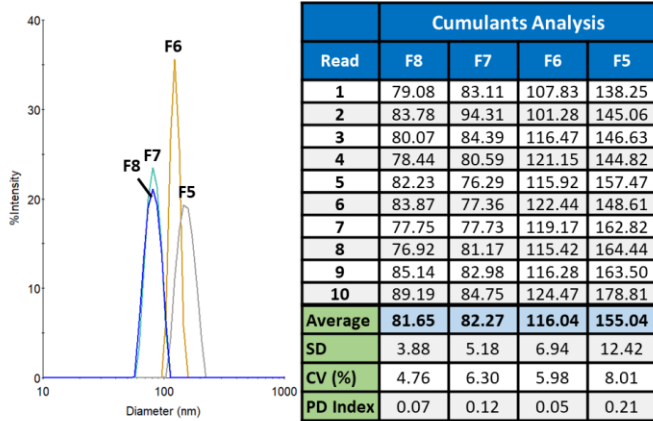

### B. Median Diameter - Donor 2

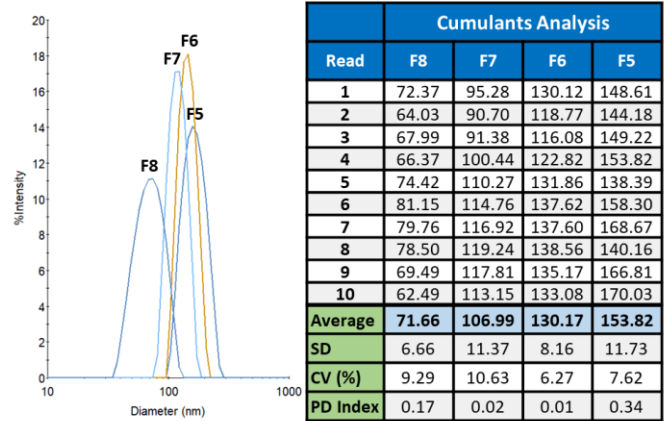

### C. Median Diameter - Donor 3

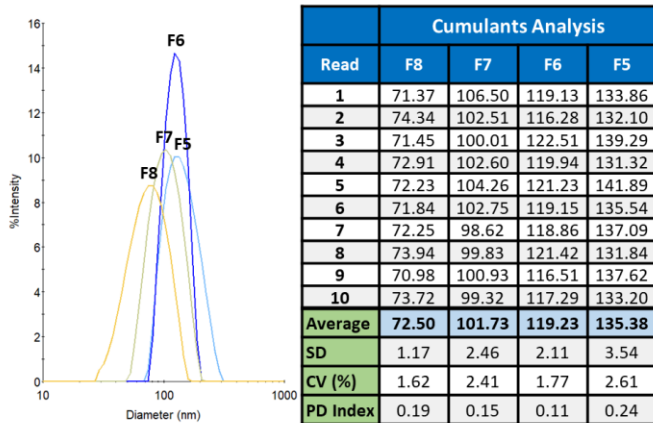

### D. Median Diameter - Donor 4

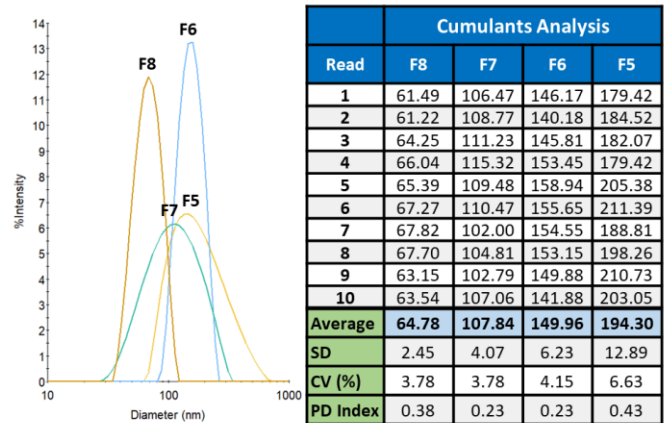

**Supplementary Figure 10.** DLS Measurements for the Plasma-EV Samples. DLS size measurements for A) Donor 1, B) Donor 2, C) Donor 3, and D) Donor 4 EV fractions 5-8. Each sample was read 10x for 10x 2-second acquisitions per read: 100 acquisitions in total. The population statistics for each sample can be found in the tables.

**A. Approximate VSSC-H for 81.7, 82.3, 116.0, and 155.0nm at RI 1.627**

|          | VSSC-H  | SD      | CV (%) |
|----------|---------|---------|--------|
| PS 60nm  | 4393.4  | 4.19    | 0.095  |
| PS 81nm  | 15105.7 | 100.81  | 0.667  |
| PS 100nm | 52568.5 | 411.62  | 0.783  |
| PS 125nm | 150236  | 126.56  | 0.084  |
| PS 152nm | 349047  | 305.93  | 0.088  |
| PS 203nm | 921498  | 2300.84 | 0.250  |

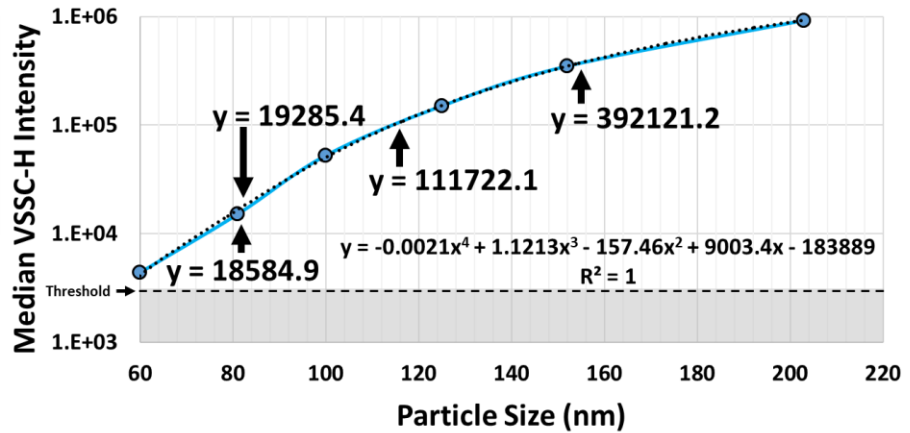

**B. RI for Donor 1 – 81.7nm EVs**

|         | Scatter Efficiency | Estimated VSSC |
|---------|--------------------|----------------|
| PS 81.7 | 0.02215            | 18584.9        |

| RI    | Scatter Efficiency | Conversion to VSSC |
|-------|--------------------|--------------------|
| 1.500 | 0.00688            | 5773.18            |
| 1.505 | 0.00732            | 6139.55            |
| 1.510 | 0.00777            | 6517.18            |
| 1.515 | 0.00823            | 6906.21            |
| 1.520 | 0.00871            | 7306.58            |
| 1.525 | 0.00920            | 7718.27            |
| 1.530 | 0.00970            | 8141.29            |
| 1.535 | 0.01022            | 8575.39            |
| 1.540 | 0.01075            | 9021.82            |

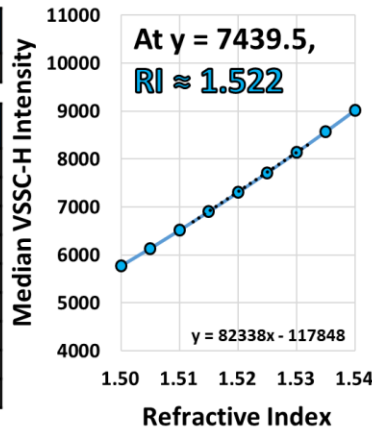

**C. RI for Donor 1 – 82.3nm EVs**

|         | Scatter Efficiency | Estimated VSSC |
|---------|--------------------|----------------|
| PS 82.3 | 0.02274            | 19285.4        |

| RI    | Scatter Efficiency | Conversion to VSSC |
|-------|--------------------|--------------------|
| 1.500 | 0.00706            | 5987.88            |
| 1.505 | 0.00751            | 6367.89            |
| 1.510 | 0.00797            | 6759.77            |
| 1.515 | 0.00845            | 7163.35            |
| 1.520 | 0.00894            | 7578.81            |
| 1.525 | 0.00944            | 8005.97            |
| 1.530 | 0.00996            | 8445.01            |
| 1.535 | 0.01049            | 8896.00            |
| 1.540 | 0.01104            | 9358.18            |

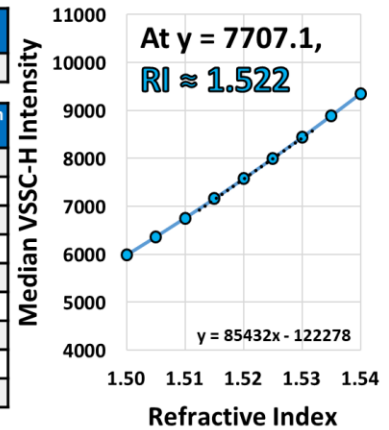

**D. RI for Donor 1 – 116.0nm EVs**

|          | Scatter Efficiency | Estimated VSSC |
|----------|--------------------|----------------|
| PS 116.0 | 0.07255            | 111722         |

| RI    | Scatter Efficiency | Conversion to VSSC |
|-------|--------------------|--------------------|
| 1.410 | 0.00421            | 6485.22            |
| 1.415 | 0.00483            | 7439.47            |
| 1.420 | 0.00549            | 8460.54            |
| 1.425 | 0.00620            | 9548.90            |
| 1.430 | 0.00695            | 10704.6            |
| 1.435 | 0.00775            | 11927.8            |
| 1.440 | 0.00859            | 13219.0            |
| 1.445 | 0.00947            | 14578.2            |
| 1.450 | 0.01039            | 16005.2            |

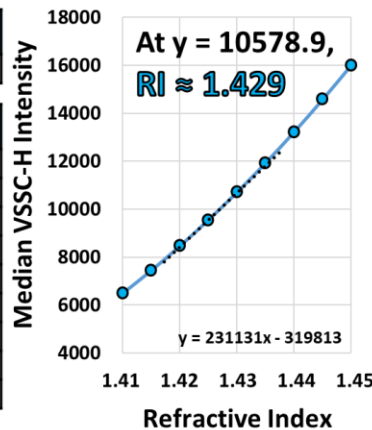

**E. RI for Donor 1 – 155.0nm EVs**

|          | Scatter Efficiency | Estimated VSSC |
|----------|--------------------|----------------|
| PS 155.0 | 0.16164            | 392121         |

| RI    | Scatter Efficiency | Conversion to VSSC |
|-------|--------------------|--------------------|
| 1.370 | 0.00179            | 4333.86            |
| 1.375 | 0.00241            | 5844.46            |
| 1.380 | 0.00313            | 7583.82            |
| 1.385 | 0.00394            | 9552.68            |
| 1.390 | 0.00484            | 11752.0            |
| 1.395 | 0.00585            | 14183.0            |
| 1.400 | 0.00694            | 16846.4            |
| 1.405 | 0.00814            | 19743.1            |
| 1.410 | 0.00943            | 22874.2            |

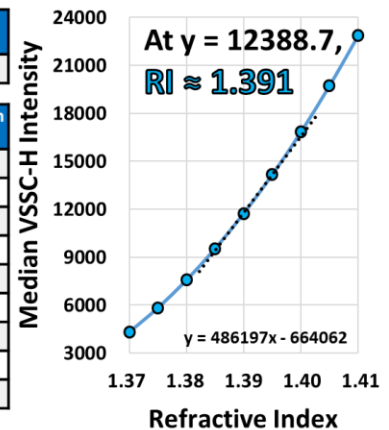

**Supplementary Figure 11.** Calculation of the RIs for the Donor 1 CD61<sup>+</sup> Plasma-EV Fractions. A) Approximation of the VSSC-H intensities for particles of equivalent size to the different EV fractions: 81.7, 82.3, 116.0, and 155.0nm. An equation was fit to the curve for the VSSC intensities of the PS reference standards, and was then solved for the expected VSSC intensities at the sizes of interest. B-E) Calculation of the RIs for the 81.7, 82.3, 116.0, and 155.0nm CD61<sup>+</sup> EVs from Donor 1, respectively. Similar to Supplementary Figure 5, the RI range was narrowed to a distribution +/- 0.02 around the RI estimated from Figure 4, using 0.005 increments. The calculated VSSC intensities were plotted vs. RI, and the equations were determined for the trendline connecting the 2 RI points closest to the mean VSSC intensity for each population. These equations were solved to identify the RIs at  $y =$  the mean VSSC intensity for each population of interest.

### A. Approximate VSSC-H for 71.7, 107.0, 130.2, and 153.8nm at RI 1.627

|          | VSSC-H  | SD      | CV (%) |
|----------|---------|---------|--------|
| PS 60nm  | 4393.4  | 4.19    | 0.095  |
| PS 81nm  | 15105.7 | 100.81  | 0.667  |
| PS 100nm | 52568.5 | 411.62  | 0.783  |
| PS 125nm | 150236  | 126.56  | 0.084  |
| PS 152nm | 349047  | 305.93  | 0.088  |
| PS 203nm | 921498  | 2300.84 | 0.250  |

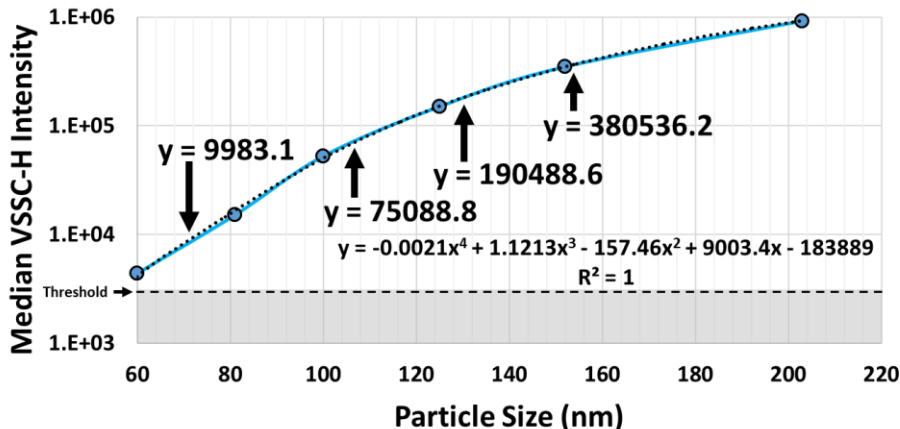

### B. RI for Donor 2 – 71.7nm EVs

|         | Scatter Efficiency | Estimated VSSC |
|---------|--------------------|----------------|
| PS 71.7 | 0.01370            | 9983.10        |

| RI    | Scatter Efficiency | Conversion to VSSC |
|-------|--------------------|--------------------|
| 1.550 | 0.00737            | 5371.29            |
| 1.555 | 0.00773            | 5628.41            |
| 1.560 | 0.00809            | 5891.43            |
| 1.565 | 0.00846            | 6160.42            |
| 1.570 | 0.00883            | 6435.32            |
| 1.575 | 0.00922            | 6716.04            |
| 1.580 | 0.00961            | 7002.74            |
| 1.585 | 0.01001            | 7295.34            |
| 1.590 | 0.01042            | 7593.33            |

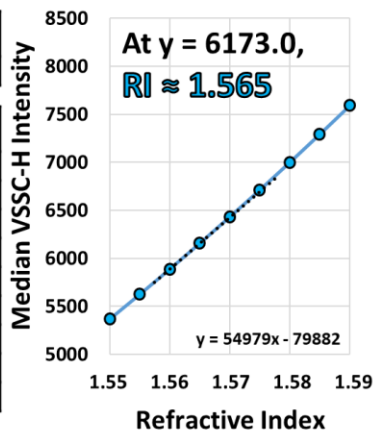

### C. RI for Donor 2 – 107.0nm EVs

|          | Scatter Efficiency | Estimated VSSC |
|----------|--------------------|----------------|
| PS 107.0 | 0.05620            | 75088.8        |

| RI    | Scatter Efficiency | Conversion to VSSC |
|-------|--------------------|--------------------|
| 1.410 | 0.00328            | 4379.69            |
| 1.415 | 0.00376            | 5023.38            |
| 1.420 | 0.00428            | 5711.95            |
| 1.425 | 0.00482            | 6445.82            |
| 1.430 | 0.00541            | 7224.85            |
| 1.435 | 0.00603            | 8049.43            |
| 1.440 | 0.00668            | 8919.43            |
| 1.445 | 0.00736            | 9835.13            |
| 1.450 | 0.00808            | 10796.7            |

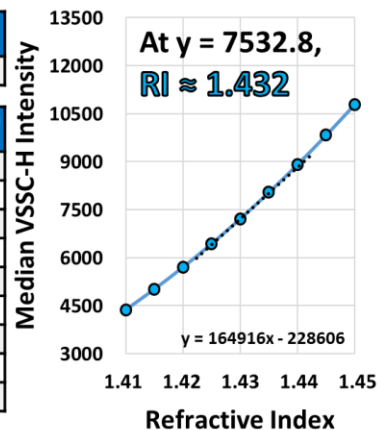

### D. RI for Donor 2 – 130.2nm EVs

|          | Scatter Efficiency | Estimated VSSC |
|----------|--------------------|----------------|
| PS 130.2 | 0.10198            | 190489         |

| RI    | Scatter Efficiency | Conversion to VSSC |
|-------|--------------------|--------------------|
| 1.380 | 0.00196            | 3659.41            |
| 1.385 | 0.00247            | 4609.61            |
| 1.390 | 0.00304            | 5671.32            |
| 1.395 | 0.00366            | 6844.74            |
| 1.400 | 0.00435            | 8130.79            |
| 1.405 | 0.00510            | 9529.66            |
| 1.410 | 0.00591            | 11041.9            |
| 1.415 | 0.00678            | 12667.9            |
| 1.420 | 0.00771            | 14408.3            |

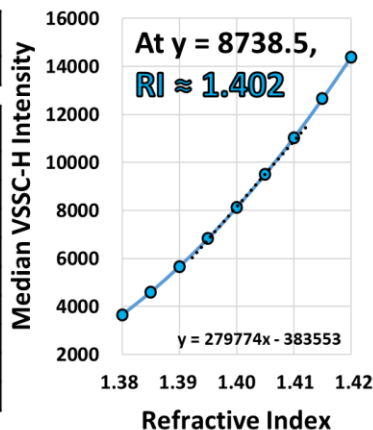

### E. RI for Donor 2 – 153.8nm EVs

|          | Scatter Efficiency | Estimated VSSC |
|----------|--------------------|----------------|
| PS 153.8 | 0.15852            | 380536         |

| RI    | Scatter Efficiency | Conversion to VSSC |
|-------|--------------------|--------------------|
| 1.370 | 0.00175            | 4204.57            |
| 1.375 | 0.00236            | 5670.35            |
| 1.380 | 0.00307            | 7357.71            |
| 1.385 | 0.00386            | 9267.83            |
| 1.390 | 0.00475            | 11401.9            |
| 1.395 | 0.00573            | 13760.5            |
| 1.400 | 0.00681            | 16344.7            |
| 1.405 | 0.00798            | 19155.2            |
| 1.410 | 0.00925            | 22193.1            |

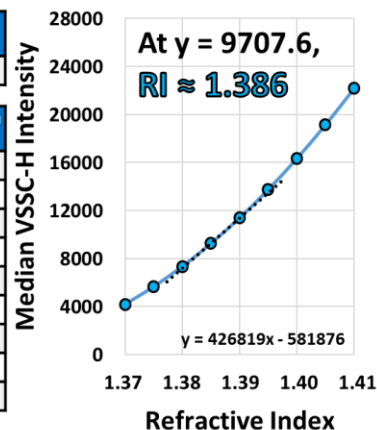

**Supplementary Figure 12.** Calculation of the RIs for the Donor 2 CD61<sup>+</sup> Plasma-EV Fractions. A) Approximation of the VSSC-H intensities for particles of equivalent size to the different EV fractions: 71.7, 107.0, 130.2, and 153.8nm. An equation was fit to the curve for the VSSC intensities of the PS reference standards, and was then solved for the expected VSSC intensities at the sizes of interest. B-E) Calculation of the RIs for the 71.7, 107.0, 130.2, and 153.8nm CD61<sup>+</sup> EVs from Donor 2, respectively. This was performed as described for Donor 1 in Supplementary Figure 11.

**A. Approximate VSSC-H for 72.5, 101.7, 119.2, and 135.4nm at RI 1.627**

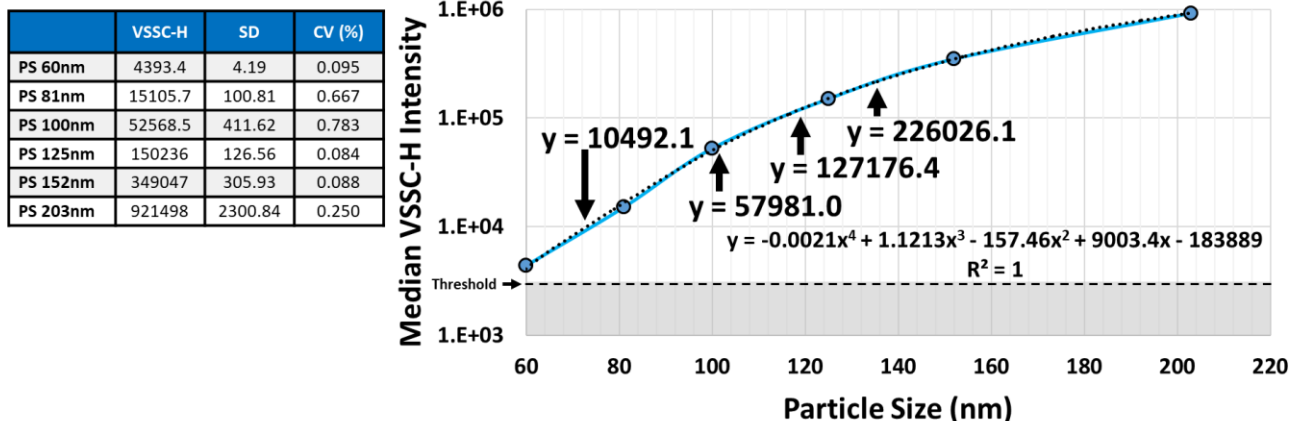

**B. RI for Donor 3 – 72.5nm EVs**

|         | Scatter Efficiency | Estimated VSSC |
|---------|--------------------|----------------|
| PS 72.5 | 0.01428            | 10492.1        |

  

| RI    | Scatter Efficiency | Conversion to VSSC |
|-------|--------------------|--------------------|
| 1.530 | 0.00629            | 4624.31            |
| 1.535 | 0.00663            | 4869.50            |
| 1.540 | 0.00697            | 5121.00            |
| 1.545 | 0.00732            | 5378.74            |
| 1.550 | 0.00768            | 5642.74            |
| 1.555 | 0.00805            | 5912.97            |
| 1.560 | 0.00842            | 6189.53            |
| 1.565 | 0.00881            | 6472.26            |
| 1.570 | 0.00920            | 6761.23            |

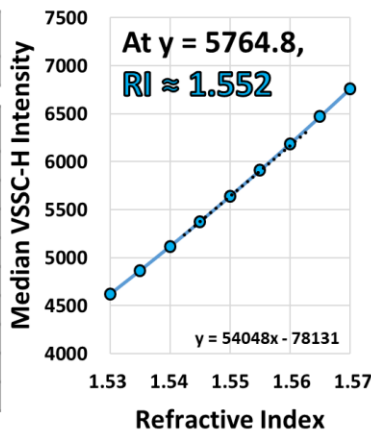

**C. RI for Donor 3 – 101.7nm EVs**

|          | Scatter Efficiency | Estimated VSSC |
|----------|--------------------|----------------|
| PS 101.7 | 0.04756            | 57981.0        |

  

| RI    | Scatter Efficiency | Conversion to VSSC |
|-------|--------------------|--------------------|
| 1.420 | 0.00363            | 4428.37            |
| 1.425 | 0.00410            | 4996.74            |
| 1.430 | 0.00459            | 5599.99            |
| 1.435 | 0.00512            | 6238.34            |
| 1.440 | 0.00567            | 6911.93            |
| 1.445 | 0.00625            | 7620.63            |
| 1.450 | 0.00686            | 8364.81            |
| 1.455 | 0.00750            | 9144.34            |
| 1.460 | 0.00817            | 9959.35            |

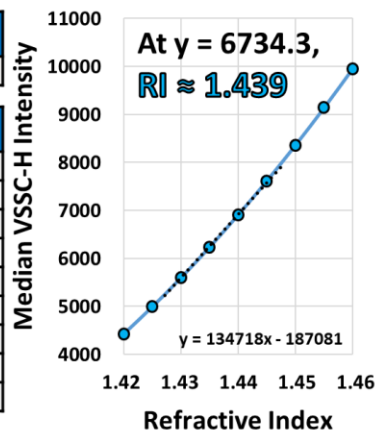

**D. RI for Donor 3 – 119.2nm EVs**

|          | Scatter Efficiency | Estimated VSSC |
|----------|--------------------|----------------|
| PS 119.2 | 0.07883            | 127176         |

  

| RI    | Scatter Efficiency | Conversion to VSSC |
|-------|--------------------|--------------------|
| 1.390 | 0.00235            | 3789.20            |
| 1.395 | 0.00283            | 4572.96            |
| 1.400 | 0.00337            | 5431.73            |
| 1.405 | 0.00395            | 6365.68            |
| 1.410 | 0.00457            | 7375.29            |
| 1.415 | 0.00524            | 8460.73            |
| 1.420 | 0.00596            | 9622.49            |
| 1.425 | 0.00673            | 10860.5            |
| 1.430 | 0.00755            | 12175.4            |

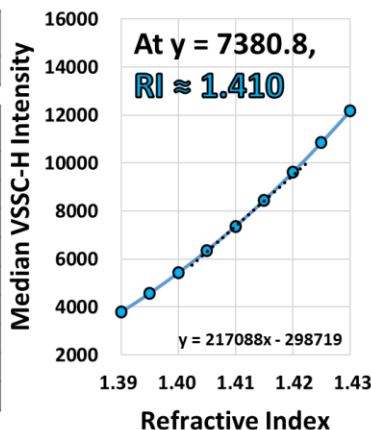

**E. RI for Donor 3 – 135.4nm EVs**

|          | Scatter Efficiency | Estimated VSSC |
|----------|--------------------|----------------|
| PS 135.4 | 0.11368            | 226026.1       |

  

| RI    | Scatter Efficiency | Conversion to VSSC |
|-------|--------------------|--------------------|
| 1.370 | 0.00125            | 2483.15            |
| 1.375 | 0.00168            | 3349.04            |
| 1.380 | 0.00219            | 4345.75            |
| 1.385 | 0.00275            | 5474.49            |
| 1.390 | 0.00339            | 6735.45            |
| 1.395 | 0.00409            | 8129.23            |
| 1.400 | 0.00486            | 9656.61            |
| 1.405 | 0.00569            | 11318.0            |
| 1.410 | 0.00660            | 13114.0            |

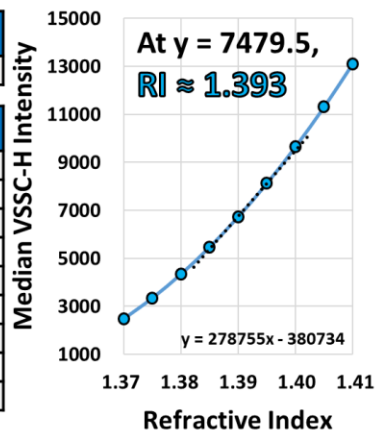

**Supplementary Figure 13.** Calculation of the RIs for the Donor 3 CD61<sup>+</sup> Plasma-EV Fractions. A) Approximation of the VSSC-H intensities for particles of equivalent size to the different EV fractions: 72.5, 101.7, 119.2, and 135.4nm. An equation was fit to the curve for the VSSC intensities of the PS reference standards, and was then solved for the expected VSSC intensities at the sizes of interest. B-E) Calculation of the RIs for the 72.5, 101.7, 119.2, and 135.4nm CD61<sup>+</sup> EVs from Donor 3, respectively. This was performed as described for Donor 1 in Supplementary Figure 11.

### A. Approximate VSSC-H for 64.8, 107.8, 150.0, and 194.3nm at RI 1.627

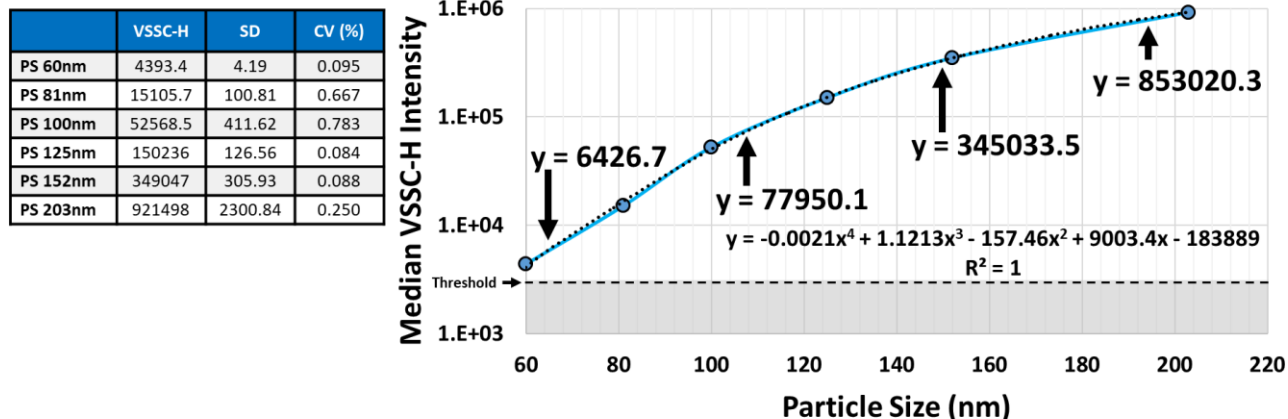

### B. RI for Donor 4 – 64.8nm EVs

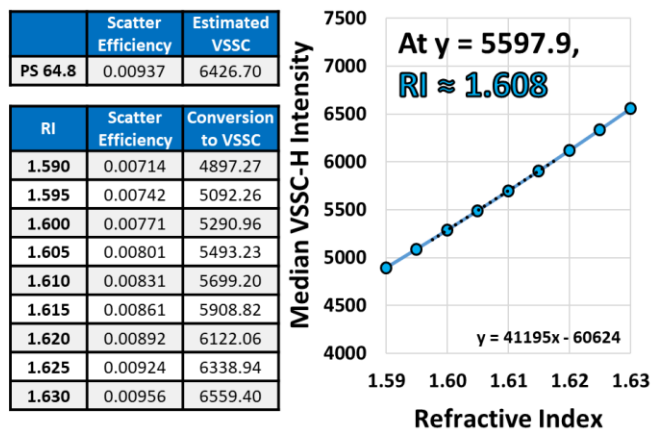

### C. RI for Donor 4 – 107.8nm EVs

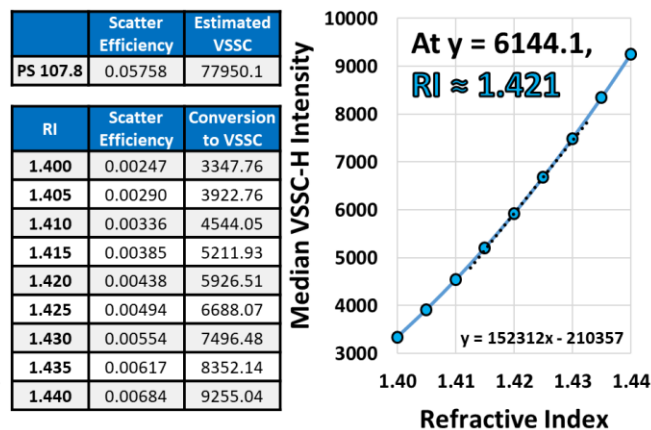

### D. RI for Donor 4 – 150.0nm EVs

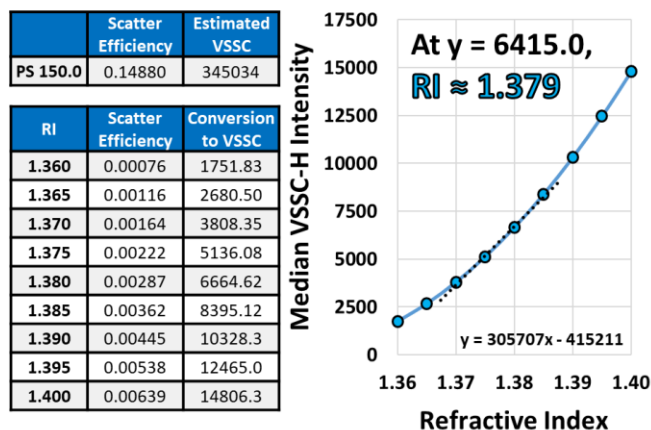

### E. RI for Donor 4 – 194.3nm EVs

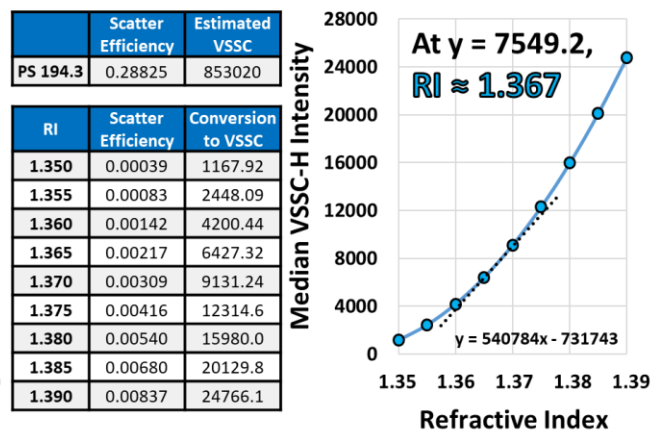

**Supplementary Figure 14.** Calculation of the RIs for the Donor 4 CD61<sup>+</sup> Plasma-EV Fractions. A) Approximation of the VSSC-H intensities for particles of equivalent size to the different EV fractions: 64.8, 107.8, 150.0, and 194.3nm. An equation was fit to the curve for the VSSC intensities of the PS reference standards, and was then solved for the expected VSSC intensities at the sizes of interest. B-E) Calculation of the RIs for the 64.8, 107.8, 150.0, and 194.3nm CD61<sup>+</sup> EVs from Donor 4, respectively. This was performed as described for Donor 1 in Supplementary Figure 11.

**A. Si 68.6nm**

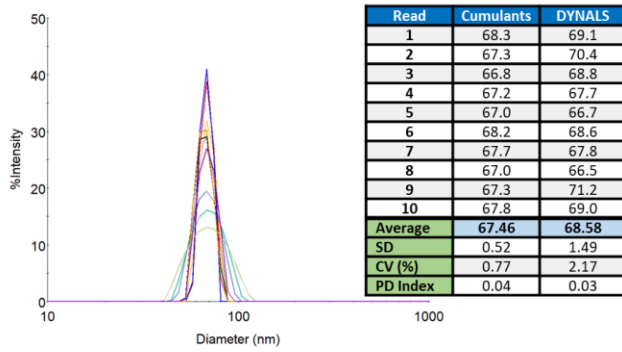

**B. Si 98.6nm**

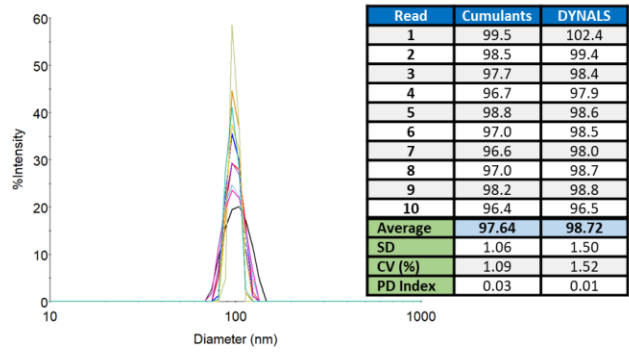

**C. Si 160nm**

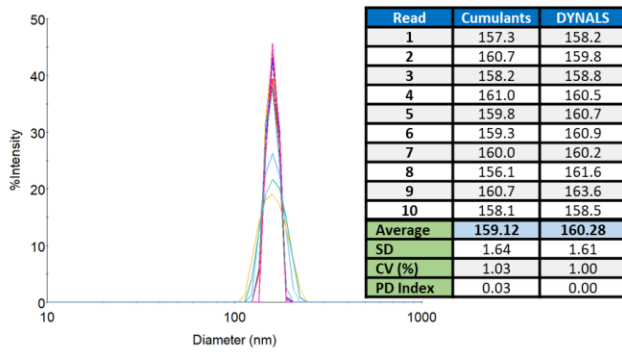

**D. Si 214nm**

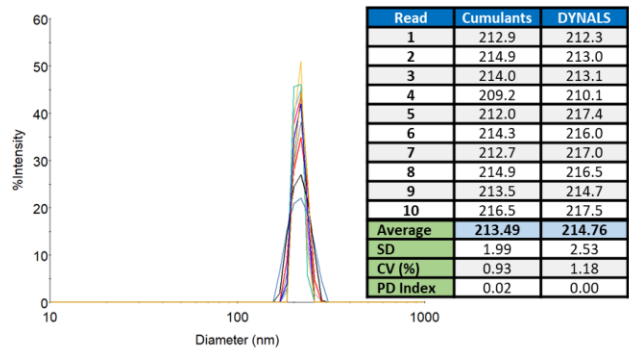

**Supplementary Figure 15.** Standardization of the DelsaMax Pro DLS Analyzer. A) 68.6nm Si NIST beads. B) 98.6nm Si NIST beads. C) 160nm Si beads. D) 214nm Si beads. Each sample was read 10x for 10x 2-second acquisitions per read. The mean diameters from both Cumulants and DYNALS analyses are displayed, along with the average, SD, CV and PD Index for each data set.
